# Supplementary material for: Differential utilization of ketone bodies by neurons and glioma cell lines: a rationale for ketogenic diet as experimental glioma therapy
Source: Springer Nature journal article supplement (doi:10.1186/1471-2407-11-315), 2011-07-26
Supplement: 12885_2011_2821_MOESM9_ESM.pdf [file 12885_2011_2821_MOESM9_ESM.pdf]

**A**

ATP

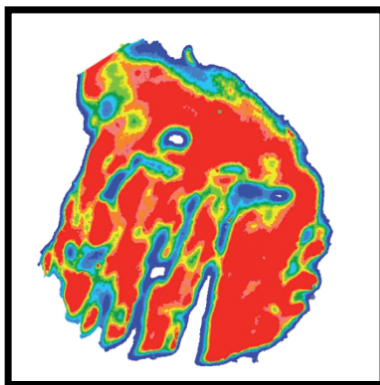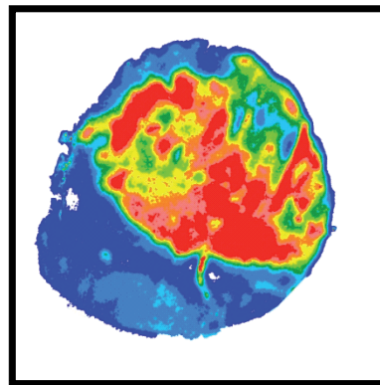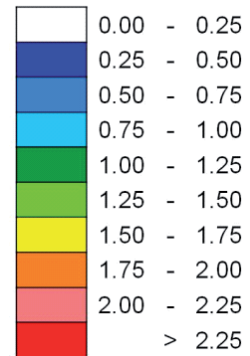**B**

glucose

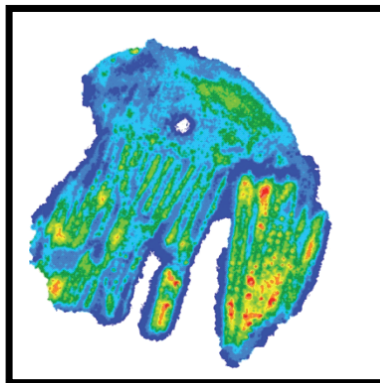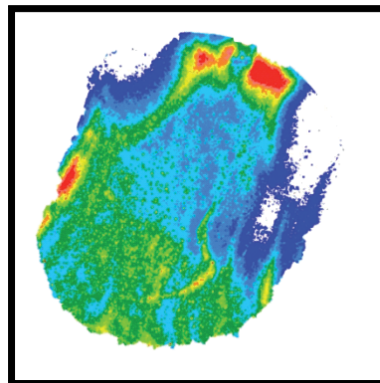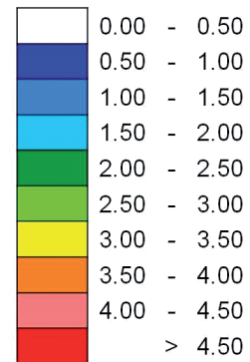**C**

lactate

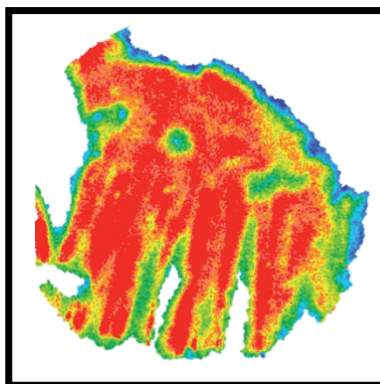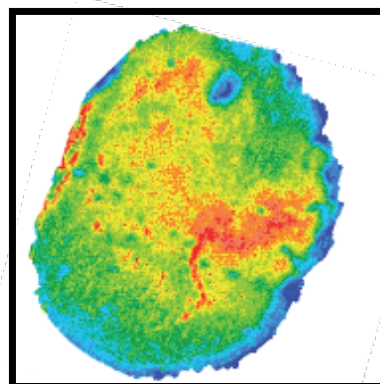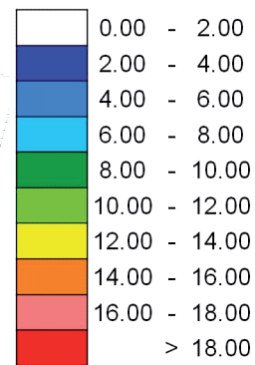**D**

hematoxylin-eosin

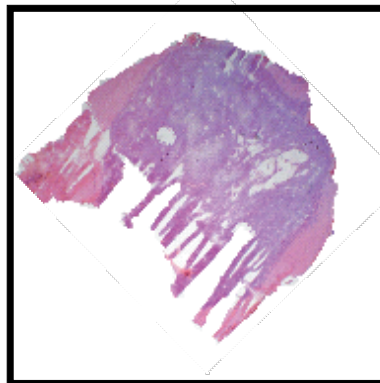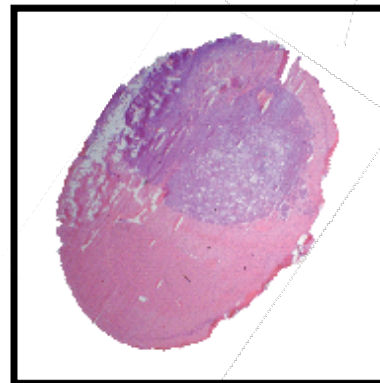

control

ketogenic diet
