# Supplementary figures and images for: Differential utilization of ketone bodies by neurons and glioma cell lines: a rationale for ketogenic diet as experimental glioma therapy
Source: Springer Nature journal article supplement (doi:10.1186/1471-2407-11-315), 2011-07-26

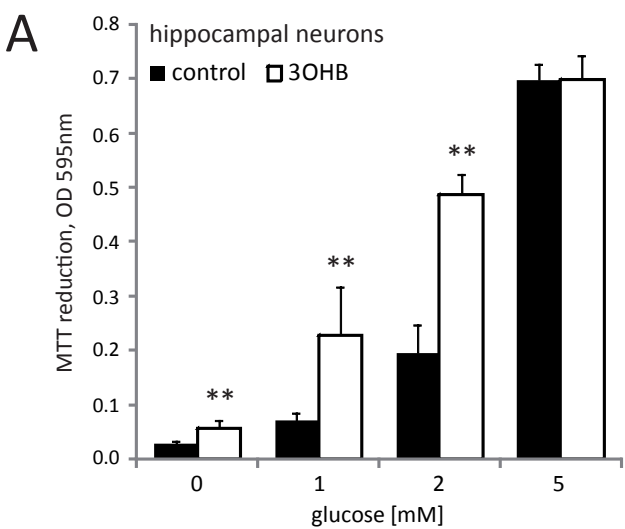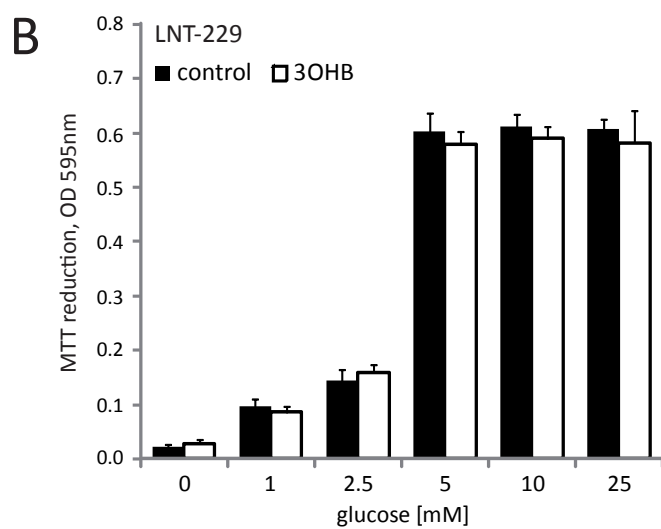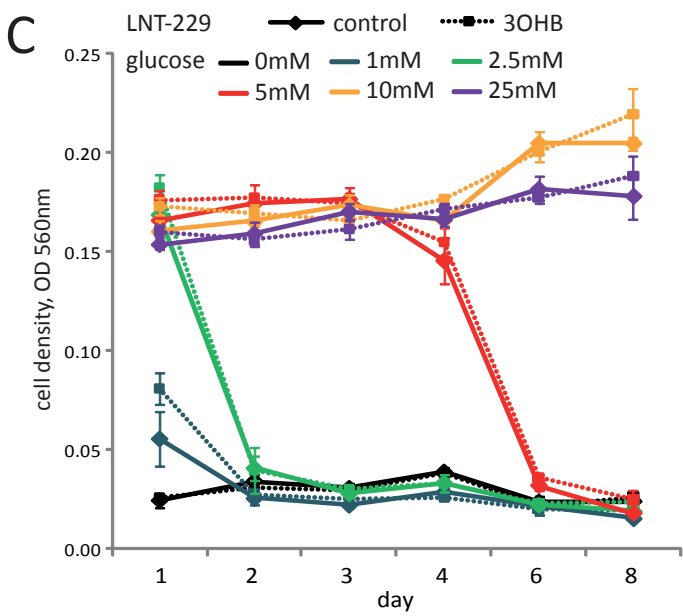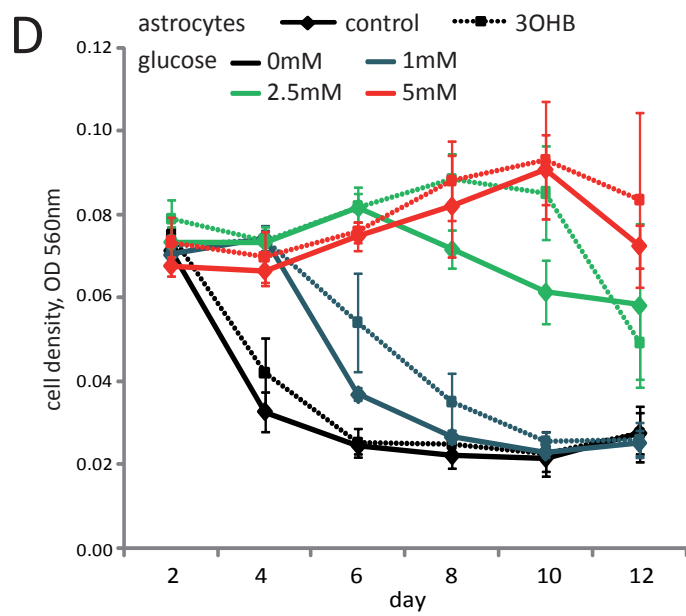

Supplement: 12885_2011_2821_MOESM4_ESM.pdf [file 12885_2011_2821_MOESM4_ESM.pdf]
